# Supplementary material for: Bacteraemia during Transurethral Resection of the Prostate: What Are the Risk Factors and Is It More Common than We Think?
Source: PubMed Central journal article supplement (PMC4938130; doi:10.1371/journal.pone.0157864), 2016-07-08
Supplement: pone.0157864.s003.pdf [file pone.0157864.s003.pdf]

# Prevalence of bacteremia during TURP

Robert M West

Thursday, February 18, 2016

```
setwd("F:\\TURP") # Select the working directory
turp.patients <- read.csv("BacteremiaTURP.csv")
library(lme4) # So that random effects can be fitted

## Loading required package: Matrix

number.patients <- length(unique(turp.patients$sample)) # Check the correct number of patients - 54

model <- glmer(Bacteremia~time.pt+(1|sample), turp.patients, family=binomial())
summary(model)

## Generalized linear mixed model fit by maximum likelihood (Laplace
## Approximation) [glmerMod]
## Family: binomial ( logit )
## Formula: Bacteremia ~ time.pt + (1 | sample)
## Data: turp.patients
##
##          AIC          BIC    logLik deviance df.resid
##    189.5         214.7    -87.7   175.5      263
##
## Scaled residuals:
##      Min       1Q   Median       3Q      Max
## -1.8924 -0.1236 -0.0992 -0.0486  4.7787
##
## Random effects:
## Groups Name          Variance Std.Dev.
## sample (Intercept) 11.19      3.345
## Number of obs: 270, groups: sample, 53
##
## Fixed effects:
##              Estimate Std. Error z value Pr(>|z|)
## (Intercept)  -5.4975     1.6416  -3.349 0.000811 ***
## time.ptB     -0.3259     1.1388  -0.286 0.774725
## time.ptC      1.3961     0.8769   1.592 0.111360
## time.ptD      1.6823     0.8749   1.923 0.054483 .
## time.ptE      1.8661     0.8935   2.088 0.036758 *
## time.ptF      1.4259     0.8777   1.625 0.104261
## ---
## Signif. codes:  0 '***' 0.001 '**' 0.01 '*' 0.05 '.' 0.1 ' ' 1
##
## Correlation of Fixed Effects:
##              (Intr) tm.ptB tm.ptC tm.ptD tm.ptE
## time.ptB    -0.195
## time.ptC    -0.479  0.436
## time.ptD    -0.510  0.434  0.652
## time.ptE    -0.521  0.425  0.644  0.658
## time.ptF    -0.468  0.436  0.639  0.649  0.640
```

```

coef.table <- as.data.frame(coef(summary(model)))
coef.table$OR <- exp(coef.table$Estimate)
coef.table$Lower <- with(coef.table, exp(Estimate - `Std. Error` * sqrt(qchisq(0.95, 1))))
coef.table$Upper <- with(coef.table, exp(Estimate + `Std. Error` * sqrt(qchisq(0.95, 1))))
coef.table[,c(5,6,7,4)] # To report results

```

```

##              OR          Lower          Upper          Pr(>|z|)
## (Intercept) 0.004096829 0.0001641161 0.1022691 0.0008111014
## time.ptB    0.721868241 0.0774716158 6.7262539 0.7747254928
## time.ptC    4.039376385 0.7242894431 22.5276811 0.1113600265
## time.ptD    5.378016735 0.9681575954 29.8743347 0.0544832587
## time.ptE    6.462865028 1.1216511889 37.2385148 0.0367575840
## time.ptF    4.161644696 0.7449684341 23.2483496 0.1042608416

```

```

var.re <- as.numeric(summary(model)$varcor)
estimated.ICC <- var.re/(var.re+ pi*pi/3)
estimated.ICC # Check

```

```
## [1] 0.7727591
```
