# Supplementary material for: Bacteraemia during Transurethral Resection of the Prostate: What Are the Risk Factors and Is It More Common than We Think?
Source: PubMed Central journal article supplement (PMC4938130; doi:10.1371/journal.pone.0157864), 2016-07-08
Supplement: pone.0157864.s004.pdf [file pone.0157864.s004.pdf]

# TURP analysis

*RM West*

*Monday, February 18, 2016*

```
library(epibasix)
library(bestglm)
```

```
## Loading required package: leaps
```

```
library(mgcv)
```

```
## Loading required package: nlme
## This is mgcv 1.8-10. For overview type 'help("mgcv-package")'.
```

```
setwd("F:\\TURP")
turp <- read.csv("TURPdata.csv")
```

```
turp$Over.75 <- ifelse(turp$Age>74.99, "Over 75", "Under 75")
turp$Over.75 <- factor(turp$Over.75, levels=c("Under 75", "Over 75"))
turp$Over.85.kg <- ifelse(turp$Weight>84.99, "Over 85 kg", "Under 85 kg")
turp$Over.75 <- factor(turp$Over.85.kg, levels=c("Under 85 kg", "Over 85 kg"))
turp$Cardiac.Hx <- ifelse(substr(turp$Cardiac.History,1,1)=="N", "No", "Yes")
```

```
tab1 <- with(turp, table(Over.75, Bacteraemia))
tab1
```

```
##           Bacteraemia
## Over.75      0  1
## Under 85 kg 29  5
## Over 85 kg  27 10
```

```
epi2x2(tab1)
```

```
## Epidemiological 2x2 Table Analysis
```

```
##
```

```
## Input Matrix:
```

```
##           Bacteraemia
## Over.75      0  1
## Under 85 kg 29  5
## Over 85 kg  27 10
##
```

```
## Pearson Chi-Squared Statistic (Includes Yates' Continuity Correction): 0.959
```

```
## Associated p.value for H0: There is an association between exposure and outcome vs. HA: No association
```

```
## p.value using Fisher's Exact Test: 0.252
```

```
##
```

```
## Estimate of Odds Ratio: 2.148
```

```
## 95% Confidence Limits for true Odds Ratio are: [0.65, 7.094]
```

```
tab1 <- with(turp, table(Over.85.kg, Bacteraemia))
tab1
```

```
##           Bacteraemia
## Over.85.kg      0  1
##   Over 85 kg  27 10
##   Under 85 kg  29  5
```

```
epi2x2(tab1)
```

```
## Epidemiological 2x2 Table Analysis
##
## Input Matrix:
##           Bacteraemia
## Over.85.kg      0  1
##   Over 85 kg  27 10
##   Under 85 kg  29  5
##
## Pearson Chi-Squared Statistic (Includes Yates' Continuity Correction): 0.959
## Associated p.value for H0: There is an association between exposure and outcome vs. HA: No association: 0.329
## p.value using Fisher's Exact Test: 0.252
##
## Estimate of Odds Ratio: 0.466
## 95% Confidence Limits for true Odds Ratio are: [0.141, 1.537]
```

```
tab1 <- with(turp, table(Prior.Antibiotics, Bacteraemia))
tab1
```

```
##           Bacteraemia
## Prior.Antibiotics  0  1
##                   0 47  8
##                   1 10  8
```

```
epi2x2(tab1)
```

```
## Epidemiological 2x2 Table Analysis
##
## Input Matrix:
##           Bacteraemia
## Prior.Antibiotics  0  1
##                   0 47  8
##                   1 10  8
##
## Pearson Chi-Squared Statistic (Includes Yates' Continuity Correction): 5.445
## Associated p.value for H0: There is an association between exposure and outcome vs. HA: No association: 0.020
## p.value using Fisher's Exact Test: 0.018
##
## Estimate of Odds Ratio: 4.7
## 95% Confidence Limits for true Odds Ratio are: [1.424, 15.515]
```

```
tab1 <- with(turp, table(Urinary.Catheter, Bacteraemia))
tab1
```

```
##           Bacteraemia
## Urinary.Catheter  0  1
##                0 32  3
##                1 25 13
```

```
epi2x2(tab1)
```

```
## Epidemiological 2x2 Table Analysis
```

```
##
```

```
## Input Matrix:
```

```
##           Bacteraemia
## Urinary.Catheter  0  1
##                0 32  3
##                1 25 13
```

```
##
```

```
## Pearson Chi-Squared Statistic (Includes Yates' Continuity Correction): 5.58
```

```
## Associated p.value for H0: There is an association between exposure and outcome vs. HA: No association
```

```
## p.value using Fisher's Exact Test: 0.011
```

```
##
```

```
## Estimate of Odds Ratio: 5.547
```

```
## 95% Confidence Limits for true Odds Ratio are: [1.424, 21.612]
```

```
tab1 <- with(turp, table(Instrumentation, Bacteraemia))
tab1
```

```
##           Bacteraemia
## Instrumentation  0  1
## N                55 15
## Y                 2  1
```

```
epi2x2(tab1)
```

```
## Epidemiological 2x2 Table Analysis
```

```
##
```

```
## Input Matrix:
```

```
##           Bacteraemia
## Instrumentation  0  1
## N                55 15
## Y                 2  1
```

```
##
```

```
## Pearson Chi-Squared Statistic (Includes Yates' Continuity Correction): 0.05
```

```
## Associated p.value for H0: There is an association between exposure and outcome vs. HA: No association
```

```
## p.value using Fisher's Exact Test: 0.53
```

```
##
```

```
## Estimate of Odds Ratio: 1.833
```

```
## 95% Confidence Limits for true Odds Ratio are: [0.155, 21.619]
```

```
tab1 <- with(turp, table(Prior.UTI, Bacteraemia))
tab1
```

```
##           Bacteraemia
## Prior.UTI  0  1
##           N  52 11
##           Y   5  5
```

```
epi2x2(tab1)
```

```
## Epidemiological 2x2 Table Analysis
```

```
##
```

```
## Input Matrix:
```

```
##           Bacteraemia
```

```
## Prior.UTI  0  1
```

```
##           N  52 11
```

```
##           Y   5  5
```

```
##
```

```
## Pearson Chi-Squared Statistic (Includes Yates' Continuity Correction): 3.607
```

```
## Associated p.value for H0: There is an association between exposure and outcome vs. HA: No association
```

```
## p.value using Fisher's Exact Test: 0.035
```

```
##
```

```
## Estimate of Odds Ratio: 4.727
```

```
## 95% Confidence Limits for true Odds Ratio are: [1.166, 19.168]
```

```
tab1 <- with(turp, table(Immunosuppressant, Bacteraemia))
```

```
tab1
```

```
##           Bacteraemia
```

```
## Immunosuppressant  0  1
```

```
## N                  55 16
```

```
## Y                   2  0
```

```
epi2x2(tab1)
```

```
## Epidemiological 2x2 Table Analysis
```

```
##
```

```
## Input Matrix:
```

```
##           Bacteraemia
```

```
## Immunosuppressant  0  1
```

```
## N                  55 16
```

```
## Y                   2  0
```

```
##
```

```
## Pearson Chi-Squared Statistic (Includes Yates' Continuity Correction): 0.011
```

```
## Associated p.value for H0: There is an association between exposure and outcome vs. HA: No association
```

```
## p.value using Fisher's Exact Test: 1
```

```
##
```

```
## Estimate of Odds Ratio: 0
```

```
## 95% Confidence Limits for true Odds Ratio are: [0, NaN]
```

```
tab1 <- with(turp, table(Diabetes, Bacteraemia))
tab1
```

```
##           Bacteraemia
## Diabetes    0  1
##  N         52 15
##  Y          5  1
```

```
epi2x2(tab1)
```

```
## Epidemiological 2x2 Table Analysis
```

```
##
```

```
## Input Matrix:
```

```
##           Bacteraemia
## Diabetes    0  1
##  N         52 15
##  Y          5  1
```

```
##
```

```
## Pearson Chi-Squared Statistic (Includes Yates' Continuity Correction): 0.036
```

```
## Associated p.value for H0: There is an association between exposure and outcome vs. HA: No association
```

```
## p.value using Fisher's Exact Test: 1
```

```
##
```

```
## Estimate of Odds Ratio: 0.693
```

```
## 95% Confidence Limits for true Odds Ratio are: [0.075, 6.4]
```

```
tab1 <- with(turp, table(Smoking, Bacteraemia))
tab1
```

```
##           Bacteraemia
## Smoking    0  1
##  N         50 15
##  Y          7  1
```

```
epi2x2(tab1)
```

```
## Epidemiological 2x2 Table Analysis
```

```
##
```

```
## Input Matrix:
```

```
##           Bacteraemia
## Smoking    0  1
##  N         50 15
##  Y          7  1
```

```
##
```

```
## Pearson Chi-Squared Statistic (Includes Yates' Continuity Correction): 0.053
```

```
## Associated p.value for H0: There is an association between exposure and outcome vs. HA: No association
```

```
## p.value using Fisher's Exact Test: 0.676
```

```
##
```

```
## Estimate of Odds Ratio: 0.476
```

```
## 95% Confidence Limits for true Odds Ratio are: [0.054, 4.184]
```

```
tab1 <- with(turp, table(Coexisting.Infection, Bacteraemia))
tab1
```

```
##                Bacteraemia
## Coexisting.Infection    0  1
##      N                  54 16
##      Y                   3  0
```

```
epi2x2(tab1)
```

```
## Epidemiological 2x2 Table Analysis
```

```
##
```

```
## Input Matrix:
```

```
##                Bacteraemia
## Coexisting.Infection    0  1
##      N                  54 16
##      Y                   3  0
```

```
##
```

```
## Pearson Chi-Squared Statistic (Includes Yates' Continuity Correction): 0.05
```

```
## Associated p.value for H0: There is an association between exposure and outcome vs. HA: No association
```

```
## p.value using Fisher's Exact Test: 1
```

```
##
```

```
## Estimate of Odds Ratio: 0
```

```
## 95% Confidence Limits for true Odds Ratio are: [0, NaN]
```

```
tab1 <- with(turp, table(Recent.Hospital, Bacteraemia))
tab1
```

```
##                Bacteraemia
## Recent.Hospital    0  1
##                   0 44  9
##                   1 13  7
```

```
epi2x2(tab1)
```

```
## Epidemiological 2x2 Table Analysis
```

```
##
```

```
## Input Matrix:
```

```
##                Bacteraemia
## Recent.Hospital    0  1
##                   0 44  9
##                   1 13  7
```

```
##
```

```
## Pearson Chi-Squared Statistic (Includes Yates' Continuity Correction): 1.803
```

```
## Associated p.value for H0: There is an association between exposure and outcome vs. HA: No association
```

```
## p.value using Fisher's Exact Test: 0.119
```

```
##
```

```
## Estimate of Odds Ratio: 2.632
```

```
## 95% Confidence Limits for true Odds Ratio are: [0.821, 8.444]
```

```
tab1 <- with(turp, table(Recurrent.UTIs, Bacteraemia))
tab1
```

```
##           Bacteraemia
## Recurrent.UTIs  0  1
##   N             50 14
##   Y              7  2
```

```
epi2x2(tab1)
```

```
## Epidemiological 2x2 Table Analysis
##
## Input Matrix:
##           Bacteraemia
## Recurrent.UTIs  0  1
##   N             50 14
##   Y              7  2
##
## Pearson Chi-Squared Statistic (Includes Yates' Continuity Correction): 0.165
## Associated p.value for H0: There is an association between exposure and outcome vs. HA: No association: 0.687
## p.value using Fisher's Exact Test: 1
##
## Estimate of Odds Ratio: 1.02
## 95% Confidence Limits for true Odds Ratio are: [0.19, 5.472]
```

```
tab1 <- with(turp, table(Urolithiasis, Bacteraemia))
tab1
```

```
##           Bacteraemia
## Urolithiasis  0  1
##   N           53 16
##   Y            4  0
```

```
epi2x2(tab1)
```

```
## Epidemiological 2x2 Table Analysis
##
## Input Matrix:
##           Bacteraemia
## Urolithiasis  0  1
##   N           53 16
##   Y            4  0
##
## Pearson Chi-Squared Statistic (Includes Yates' Continuity Correction): 0.219
## Associated p.value for H0: There is an association between exposure and outcome vs. HA: No association: 0.635
## p.value using Fisher's Exact Test: 0.57
##
## Estimate of Odds Ratio: 0
## 95% Confidence Limits for true Odds Ratio are: [0, NaN]
```

```
tab1 <- with(turp, table(Urinary.Catheter, Bacteraemia))
tab1
```

```
##           Bacteraemia
## Urinary.Catheter  0  1
##                   0 32  3
##                   1 25 13
```

```
epi2x2(tab1)
```

```
## Epidemiological 2x2 Table Analysis
##
## Input Matrix:
##           Bacteraemia
## Urinary.Catheter  0  1
##                   0 32  3
##                   1 25 13
##
## Pearson Chi-Squared Statistic (Includes Yates' Continuity Correction): 5.58
## Associated p.value for H0: There is an association between exposure and outcome vs. HA: No association: 0.011
## p.value using Fisher's Exact Test: 0.011
##
## Estimate of Odds Ratio: 5.547
## 95% Confidence Limits for true Odds Ratio are: [1.424, 21.612]
```

```
tab1 <- with(turp, table(Catheter.Duration, Bacteraemia))
tab1
```

```
##           Bacteraemia
## Catheter.Duration  0  1
##                   28  2
## CISC                4  1
## LT 1m              11  5
## Over 1m            14  8
```

```
epi2x2(tab1[c(1,2),])
```

```
## Epidemiological 2x2 Table Analysis
##
## Input Matrix:
##           Bacteraemia
## Catheter.Duration  0  1
##                   28  2
## CISC                4  1
##
## Pearson Chi-Squared Statistic (Includes Yates' Continuity Correction): 0.015
## Associated p.value for H0: There is an association between exposure and outcome vs. HA: No association: 0.015
## p.value using Fisher's Exact Test: 0.38
##
## Estimate of Odds Ratio: 3.5
## 95% Confidence Limits for true Odds Ratio are: [0.255, 48.032]
```



```
epi2x2(tab1[c(1,3),])
```

```
## Epidemiological 2x2 Table Analysis
##
## Input Matrix:
##           Bacteraemia
## Catheter.Duration  0 1
##                   28 2
##           LT 1m 11 5
##
## Pearson Chi-Squared Statistic (Includes Yates' Continuity Correction): 3.168
## Associated p.value for H0: There is an association between exposure and outcome vs. HA: No association: 0.076
## p.value using Fisher's Exact Test: 0.04
##
## Estimate of Odds Ratio: 6.364
## 95% Confidence Limits for true Odds Ratio are: [1.071, 37.81]
```

```
epi2x2(tab1[c(1,4),])
```

```
## Epidemiological 2x2 Table Analysis
##
## Input Matrix:
##           Bacteraemia
## Catheter.Duration  0 1
##                   28 2
##           Over 1m 14 8
##
## Pearson Chi-Squared Statistic (Includes Yates' Continuity Correction): 5.421
## Associated p.value for H0: There is an association between exposure and outcome vs. HA: No association: 0.02
## p.value using Fisher's Exact Test: 0.012
##
## Estimate of Odds Ratio: 8
## 95% Confidence Limits for true Odds Ratio are: [1.495, 42.798]
```

```
tab1 <- with(turp, table(Cardiac.Hx, Bacteraemia))
tab1
```

```
##           Bacteraemia
## Cardiac.Hx  0 1
##           No 35 9
##           Yes 22 7
```

```
epi2x2(tab1)
```

```
## Epidemiological 2x2 Table Analysis
##
## Input Matrix:
##           Bacteraemia
## Cardiac.Hx  0 1
##           No 35 9
##           Yes 22 7
```

```

##
## Pearson Chi-Squared Statistic (Includes Yates' Continuity Correction): 0.007
## Associated p.value for H0: There is an association between exposure and outcome vs. HA: No association
## p.value using Fisher's Exact Test: 0.776
##
## Estimate of Odds Ratio: 1.237
## 95% Confidence Limits for true Odds Ratio are: [0.403, 3.802]

turp.data <- data.frame(with(turp, cbind(Prior.Antibiotics, Urinary.Catheter, Prior.UTI, Diabetes, Hi
turp.data <- na.omit(turp.data) # Check that there is no missing data for model selection procedure
best.AIC.model <- bestglm(turp.data, IC="AIC", family=binomial())

## Morgan-Tatar search since family is non-gaussian.

best.AIC.model

## AIC
## BICq equivalent for q in (0.446891293449154, 0.837384366314189)
## Best Model:
##
##           Estimate Std. Error  z value  Pr(>|z|)
## (Intercept)    -3.418718  0.8122956 -4.208711 2.568313e-05
## Prior.Antibiotics1  1.468581  0.6848091  2.144512 3.199190e-02
## Urinary.Catheter1  1.593923  0.7524548  2.118297 3.414988e-02
## Histology1        1.589763  0.6764072  2.350305 1.875802e-02

model <- glm(Bacteraemia~Prior.Antibiotics+Urinary.Catheter+Histology, data=turp, family=binomial())
summary(model)

##
## Call:
## glm(formula = Bacteraemia ~ Prior.Antibiotics + Urinary.Catheter +
##   Histology, family = binomial(), data = turp)
##
## Deviance Residuals:
##   Min       1Q   Median       3Q      Max
## -1.0794  -0.5468  -0.2539  -0.2539   2.6271
##
## Coefficients:
##           Estimate Std. Error z value Pr(>|z|)
## (Intercept)    -3.4187    0.8123  -4.209 2.57e-05 ***
## Prior.Antibiotics  1.4686    0.6848   2.145  0.0320 *
## Urinary.Catheter  1.5939    0.7525   2.118  0.0341 *
## Histology        1.5898    0.6764   2.350  0.0188 *
## ---
## Signif. codes:  0 '***' 0.001 '**' 0.01 '*' 0.05 '.' 0.1 ' ' 1
##
## (Dispersion parameter for binomial family taken to be 1)
##
##   Null deviance: 76.776  on 72  degrees of freedom
## Residual deviance: 59.297  on 69  degrees of freedom
## AIC: 67.297
##
## Number of Fisher Scoring iterations: 5

```

```
coef.table <- as.data.frame(coef(summary(model)))
coef.table$OR <- exp(coef.table$Estimate)
coef.table$Lower <- with(coef.table, exp(Estimate - `Std. Error` * sqrt(qchisq(0.95, 1))))
coef.table$Upper <- with(coef.table, exp(Estimate + `Std. Error` * sqrt(qchisq(0.95, 1))))
coef.table[,c(5,6,7,4)]
```

```
##
##              OR      Lower      Upper      Pr(>|z|)
## (Intercept)  0.03275441 0.00666565 0.1609522 2.568313e-05
## Prior.Antibiotics 4.34306891 1.13471330 16.6229192 3.199190e-02
## Urinary.Catheter 4.92302492 1.12652626 21.5140785 3.414988e-02
## Histology      4.90258900 1.30216688 18.4579866 1.875802e-02
```

```
model <- gam(Bacteraemia~s(Age)+s(Weight)+Prior.Antibiotics+Urinary.Catheter+Histology, data=turp, fami
summary(model) # These terms even with nonlinearity add little - higher AIC
```

```
##
## Family: binomial
## Link function: logit
##
## Formula:
## Bacteraemia ~ s(Age) + s(Weight) + Prior.Antibiotics + Urinary.Catheter +
##      Histology
##
## Parametric coefficients:
##              Estimate Std. Error z value Pr(>|z|)
## (Intercept)   -4.1209     1.0750  -3.833 0.000126 ***
## Prior.Antibiotics  1.3663     0.8125   1.682 0.092635 .
## Urinary.Catheter  2.2547     1.0656   2.116 0.034348 *
## Histology       1.8757     0.8876   2.113 0.034581 *
## ---
## Signif. codes:  0 '***' 0.001 '**' 0.01 '*' 0.05 '.' 0.1 ' ' 1
##
## Approximate significance of smooth terms:
##              edf Ref.df Chi.sq p-value
## s(Age)       1.000   1.00  0.007  0.934
## s(Weight)    6.086   7.23  7.726  0.410
##
## R-sq.(adj) = 0.268  Deviance explained = 36.7%
## UBRE = -0.034768  Scale est. = 1          n = 71
```

```
plot(model, pages=1)
```

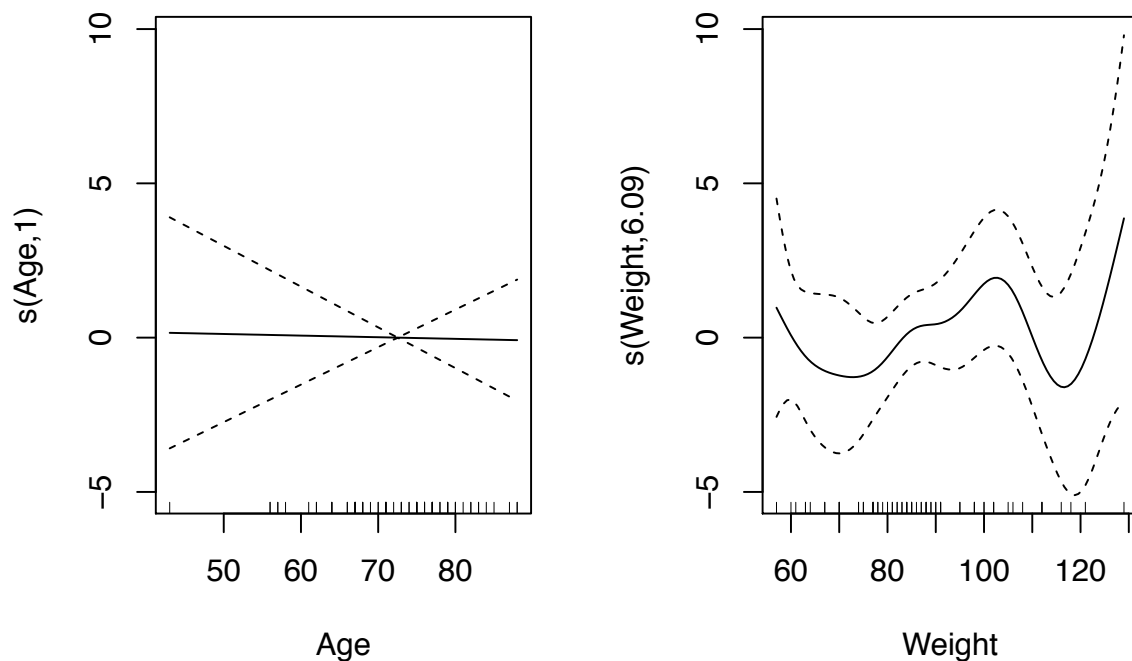

```
model <- glm(Bacteraemia~Prior.Antibiotics+Catheter.Duration+Histology, data=turp, family=binomial())
summary(model) # AIC increased, so no need to consider duration over catheter provision
```

```
##
## Call:
## glm(formula = Bacteraemia ~ Prior.Antibiotics + Catheter.Duration +
##       Histology, family = binomial(), data = turp)
##
## Deviance Residuals:
##      Min       1Q   Median       3Q      Max
## -1.2002  -0.5669  -0.3233  -0.2400   2.6690
##
## Coefficients:
##              Estimate Std. Error z value Pr(>|z|)
## (Intercept)    -3.5328     0.8874  -3.981 6.86e-05 ***
## Prior.Antibiotics  1.4235     0.6958   2.046  0.0408 *
## Catheter.DurationCISC  0.6077     1.4733   0.412  0.6800
## Catheter.DurationLT 1m  1.6713     0.9948   1.680  0.0929 .
## Catheter.DurationOver 1m 1.7859     0.9055   1.972  0.0486 *
## Histology        1.5551     0.6826   2.278  0.0227 *
## ---
## Signif. codes:  0 '***' 0.001 '**' 0.01 '*' 0.05 '.' 0.1 ' ' 1
##
## (Dispersion parameter for binomial family taken to be 1)
##
```

```
## Null deviance: 76.776 on 72 degrees of freedom
## Residual deviance: 59.111 on 67 degrees of freedom
## AIC: 71.111
##
## Number of Fisher Scoring iterations: 5
```
